# Supplementary material for: Introducing the Algerian Mitochondrial DNA and Y-Chromosome Profiles into the North African Landscape
Source: PLoS One. 2013 Feb 19;8(2):e56775. doi: 10.1371/journal.pone.0056775 (PMC3576335; doi:10.1371/journal.pone.0056775)
Supplement: Table S2 — mtDNA Haplogroup frequencies (%) in the studied populations. (XLS) [file pone.0056775.s002.xls]

## Sheet: TS2
Table S2. mtDNA Haplogroup frequencies (%) in the studied populations
							Populations1,2
Haplogroup	IP	FRC	ISS	BAL	SAM	MOR	ALG	TUN	TuAn	LIB	EGY	CAU	TUR	LEQ	IRN	ARP
H/HV	45.49	47.16	44.00	27.19	17.93	30.49	28.76	25.55	34.19	20.07	15.70	32.70	34.62	27.33	24.68	10.38
HV1	0.05	0.23	0.59	17.00	-	0.25	0.27	2.03	1.94	1.12	2.71	1.89	1.42	2.44	1.30	1.03
HV0/HV0a/V	7.23	4.83	3.64	3.45	8.28	8.12	6.72	4.57	6.45	8.55	2.52	1.26	0.61	0.76	0.43	-
R0a	0.39	0.31	1.03	1.12	2.07	1.84	0.81	1.35	3.23	2.23	1.74	0.39	1.01	3.97	0.97	13.03
R*	1.16	0.92	0.79	1.27	2.07	0.84	0.81	0.51	0.65	-	0.19	1.42	5.26	2.44	3.03	2.16
B	0.08	0.23	-	-	-	-	-	-	-	-	-	0.08	0.20	0.15	0.87	0.30
F	-	0.08	-	0.46	-	-	-	-	-	-	-	0.24	0.40	0.15	-	0.10
U1*	0.03	0.08	1.19	1.42	-	0.08	0.54	1.52	-	0.37	0.58	4.18	4.05	3.36	2.27	1.18
U2*	0.03	-	0.59	0.05	-	0.17	-	-	-	0.37	-	0.55	-	0.31	0.43	0.98
U2e	1.16	1.46	0.83	0.96	-	0.42	-	0.17	-	0.37	0.19	1.34	1.01	0.76	0.97	0.93
U3*	1.01	1.07	2.38	2.08	-	1.09	3.23	1.35	-	2.23	3.10	4.89	4.86	6.11	3.35	1.52
U4	0.96	1.46	0.91	1.62	-	0.50	1.61	0.34	-	0.37	0.78	3.47	0.61	1.22	0.65	0.79
U4a*	0.26	0.61	0.40	0.36	-	0.08	-	-	-	-	0.19	0.39	0.20	0.31	0.22	0.15
U4c1	0.28	0.38	0.16	0.71	-	0.08	-	-	-	-	-	0.39	0.20	-	0.11	-
U5*	1.63	1.23	0.44	0.05	1.38	0.67	0.54	0.51	-	1.12	3.10	0.24	-	-	0.11	0.15
U5a	2.09	2.53	2.53	4.11	-	0.92	1.08	0.51	-	1.49	0.19	4.89	1.42	1.37	2.38	0.69
U5a1b1	0.36	1.07	0.12	0.25	-	0.08	-	0.34	1.94	-	-	0.63	-	-	0.22	-
U5b*	2.53	1.07	0.24	0.66	-	-	0.27	-	-	-	0.19	0.39	-	-	0.11	0.05
U5b1b*	1.21	1.38	0.71	2.03	6.21	1.59	-	0.34	0.65	0.74	-	0.24	0.40	0.31	0.22	-
U5b1c	0.65	0.38	0.12	0.10	-	-	-	-	-	-	-	-	0.40	-	-	-
U5b3	0.52	0.38	0.71	0.05	-	0.08	-	0.17	-	-	-	0.08	-	-	-	-
U6a	0.49	0.08	0.20	-	7.59	3.43	1.88	1.35	2.58	0.74	0.19	-	-	0.31	0.11	0.20
U6a1'2'3	0.52	0.15	0.28	-	3.45	4.27	9.41	3.38	3.23	2.60	0.58	-	-	0.76	0.11	0.25
U6b'c'd	0.44	-	0.04	-	-	0.75	0.54	0.51	-	0.74	-	-	-	-	-	0.25
U7	0.10	0.08	0.79	0.36	-	-	-	0.51	-	-	0.78	0.55	1.21	1.68	7.47	1.67
U8*	0.52	0.54	0.32	0.51	-	0.08	0.54	0.17	-	1.12	0.39	0.24	0.81	0.31	0.76	0.30
U9a	-	-	-	-	-	-	-	-	-	-	0.19	-	-	0.15	-	1.48
K*	5.24	8.21	7.49	5.33	4.83	4.44	1.61	4.40	0.65	4.83	5.04	2.99	5.87	5.80	7.36	3.44
K1a*	0.21	0.08	0.04	0.36	-	0.08	-	0.51	-	-	-	2.21	0.20	0.15	0.11	0.05
K1b1*	0.49	0.54	0.04	0.20	-	0.08	-	-	-	0.37	-	0.32	-	0.61	0.11	0.15
T	0.36	0.77	0.75	0.36	-	0.42	1.08	0.17	3.23	-	0.78	1.50	1.01	0.46	1.41	0.34
T1*	0.10	0.08	0.24	0.46	-	-	-	-	1.29	-	-	0.55	1.01	0.61	0.76	0.49
T1a	1.86	1.61	2.42	2.59	-	1.34	3.49	5.58	2.58	1.49	4.84	2.44	2.02	2.75	2.38	1.67
T2	1.32	1.15	1.94	2.08	0.69	0.50	0.27	0.17	0.65	0.37	1.55	3.55	3.04	2.14	2.92	0.39
T2b*	2.14	3.37	2.53	1.83	-	1.42	1.88	1.02	2.58	2.23	0.58	0.87	0.20	1.37	0.76	0.20
T2b4	0.80	0.84	0.87	0.36	-	0.17	-	-	-	-	-	0.16	0.20	0.31	0.43	0.25
T2c	0.83	0.77	1.03	0.86	-	1.76	0.54	0.51	0.65	1.49	1.16	0.47	0.81	1.07	1.41	1.62
T2h	0.28	-	0.55	0.61	-	-	0.27	0.17	0.65	-	0.58	0.47	0.40	0.46	-	0.10
T2e	0.93	0.31	1.31	0.36	-	0.08	-	0.34	-	0.37	1.36	0.24	-	0.31	0.11	0.74
J / J1c / J2	4.60	5.14	4.59	5.43	2.07	2.68	3.76	3.05	1.29	3.72	3.29	1.50	3.24	2.90	2.81	2.90
J1a'b'e	0.28	0.23	0.32	0.61	-	0.17	-	-	1.29	1.12	0.78	1.02	1.42	1.53	2.92	6.30
J1b1a1	0.39	0.69	0.36	0.36	-	0.08	-	0.34	-	-	0.39	0.24	1.42	0.15	0.43	0.10
J1b2a	0.08	0.15	0.32	0.41	0.69	0.08	0.27	0.34	-	0.74	-	0.55	1.01	0.92	3.03	3.25
J1c7	0.13	0.31	0.32	1.07	-	-	-	0.17	0.65	-	-	0.32	0.20	0.15	0.11	0.10
J1d / J2b	0.41	0.15	0.83	0.15	-	0.42	-	0.17	-	-	0.58	2.13	1.01	0.92	2.38	0.59
J1d1	0.03	-	0.08	0.05	-	0.25	-	-	-	3.72	0.97	0.16	0.20	0.61	0.22	3.00
J2a	0.49	0.31	0.28	0.15	-	0.59	-	-	-	0.37	0.19	0.16	-	0.61	0.32	0.10
J2a2a1	-	-	-	0.05	-	-	0.27	0.34	0.65	-	0.19	-	-	0.15	-	1.57
J2b1	0.80	0.38	1.07	0.10	-	0.67	0.27	-	1.29	-	-	-	0.40	-	-	-
N1a*	0.08	0.31	0.12	0.25	-	0.17	-	-	-	0.37	0.78	0.32	0.20	-	0.22	1.48
N1b	0.34	0.38	1.27	1.07	0.69	0.42	-	1.69	-	0.74	2.91	1.34	1.21	2.90	1.95	1.57
N1c	-	-	0.20	0.15	-	-	-	-	-	0.37	-	0.32	-	0.46	0.65	2.31
I	0.80	1.23	0.99	0.96	-	-	0.54	0.17	-	0.37	1.55	1.89	1.21	0.61	2.27	0.74
I1	0.46	0.77	0.48	1.12	-	-	-	1.02	0.65	-	1.16	1.18	0.81	0.46	1.30	0.89
I4	0.18	-	-	0.15	-	0.08	-	-	-	-	-	-	-	-	-	-
N2	1.55	1.69	1.82	2.18	-	0.75	0.81	0.17	0.65	-	0.78	2.52	1.62	1.07	3.35	0.89
X	1.27	0.54	2.06	2.44	-	2.09	1.08	0.34	1.29	0.74	1.36	3.15	2.43	3.36	1.41	1.97
X1a	0.08	-	0.04	-	-	0.08	-	0.17	-	-	2.13	0.08	-	0.15	0.11	-
X2b1	-	0.08	0.20	0.10	-	-	-	0.17	-	-	-	0.32	0.61	-	0.32	0.10
X2c'e	0.39	0.31	-	0.25	-	0.17	-	0.51	-	1.49	-	-	-	-	-	-
N9	-	-	-	-	-	-	-	-	-	-	0.19	0.32	0.40	-	0.11	0.05
A	0.05	0.08	0.04	0.05	-	-	-	-	-	-	-	0.08	1.01	0.15	0.43	0.05
M1	0.31	-	0.32	0.15	0.69	3.18	7.26	2.71	0.65	1.86	2.13	-	-	0.31	0.11	1.43
M1a1	0.15	0.08	0.32	0.20	-	0.50	-	-	-	1.12	6.40	0.39	-	0.92	0.11	1.03
C/Z	0.05	0.08	0.12	0.10	-	-	-	-	-	-	-	1.73	1.21	-	1.62	0.10
D/G/M9/E	0.05	0.08	0.20	0.25	-	0.17	-	-	-	0.37	0.39	3.07	2.02	0.15	0.87	0.59
N* / M* / L3*	0.28	0.84	0.28	0.71	0.69	0.84	0.27	0.51	0.65	0.37	1.74	0.71	2.63	1.37	3.03	3.94
L3c/L4/M	0.03	-	-	-	-	0.08	-	-	-	-	1.16	0.24	0.61	-	0.43	0.25
L3b	0.08	-	0.04	-	2.76	1.17	0.27	1.35	0.65	1.12	0.39	-	-	0.76	-	0.79
L3b1a3	0.15	-	0.12	-	2.76	0.59	1.34	1.02	0.65	-	0.39	-	0.20	0.31	0.22	0.15
L3b2a	0.05	-	-	-	-	-	0.27	0.85	-	-	0.19	-	-	-	-	0.05
L3b(16124!)	-	-	-	-	-	0.25	0.27	-	1.94	1.86	-	-	-	-	-	0.05
L3d*	0.03	-	0.16	-	1.38	0.67	1.34	0.85	0.65	1.12	0.78	-	0.40	0.31	-	0.20
L3d1a1	-	-	-	-	-	0.08	-	-	-	1.12	-	-	-	-	-	1.08
L3d1d	-	-	-	-	0.69	0.34	-	0.17	-	-	0.19	-	-	0.31	-	0.05
L3e1*	0.03	0.08	0.04	-	0.69	0.25	0.27	0.85	1.94	0.37	2.71	-	0.20	0.61	-	0.84
L3e2'3'4	0.18	0.08	0.16	-	0.69	1.17	1.08	0.68	1.29	1.49	0.97	-	-	0.92	-	1.08
L3e5	0.08	-	0.12	-	-	2.60	1.61	2.88	1.29	-	0.58	-	-	-	-	0.10
L3f*	0.15	0.08	0.04	-	-	0.42	0.54	2.37	1.94	1.12	0.58	-	-	0.15	0.11	0.34
L3f1b*	0.05	-	0.08	-	2.07	0.25	0.81	1.69	0.65	3.35	2.33	-	0.20	0.76	-	0.59
L3h1b*	0.08	-	-	-	-	0.08	-	1.02	-	0.37	0.19	-	-	0.15	-	0.15
L3i*	-	-	-	-	-	-	-	-	-	-	0.19	-	-	0.15	-	0.34
L3x*	0.26	-	-	-	-	-	-	0.17	-	0.37	0.78	-	0.20	0.31	0.11	0.34
L4a'b*	-	-	-	-	-	0.34	0.27	0.34	-	1.12	0.39	-	-	0.31	-	0.84
L6	-	-	-	-	-	-	-	0.17	-	-	-	-	-	-	-	0.79
L2*	0.26	-	-	-	4.14	0.25	0.54	-	1.29	0.74	-	0.08	-	0.15	-	-
L2a	0.10	0.08	0.04	-	-	0.42	0.81	1.69	3.23	1.12	1.55	-	-	0.76	-	0.74
L2a1*	0.21	0.15	-	0.10	4.83	0.92	1.34	2.20	0.65	1.49	0.58	-	0.20	1.37	-	1.23
L2a1a2'3'4	0.10	-	0.08	-	-	0.42	0.27	1.18	1.29	0.37	-	-	-	0.15	0.11	1.03
L2a1b	-	-	-	-	-	-	0.27	-	-	-	-	-	-	0.15	-	0.59
L2a1b断	0.08	0.15	0.04	-	3.45	0.92	1.34	0.85	1.29	2.60	0.78	-	-	0.15	-	0.20
L2a1c1'2	-	-	-	-	0.69	0.34	0.27	0.17	0.65	0.37	0.19	-	-	-	0.11	0.10
L2a1(16189)	-	-	0.04	-	0.69	0.50	0.81	0.85	-	0.37	0.78	-	-	0.61	-	0.34
L2a2	-	-	-	-	-	-	-	0.17	-	-	0.19	-	-	-	-	0.20
L2b*	0.13	-	-	-	1.38	0.59	0.27	0.85	-	1.86	0.39	-	-	-	-	0.30
L2c1'2	-	-	-	-	-	0.25	1.34	0.17	0.65	-	-	-	-	0.15	-	0.20
L2d	0.03	-	-	-	2.76	0.25	-	-	-	-	-	-	-	-	-	0.25
L2e	-	-	-	-	-	0.17	-	1.02	-	-	-	-	-	-	-	0.05
L5*	-	-	-	-	-	0.08	-	-	-	-	0.97	-	-	-	-	0.34
L1b*	0.77	0.08	0.12	0.10	8.97	5.44	2.96	2.71	3.87	2.97	0.39	-	-	0.31	-	0.20
L1b3	0.10	0.08	0.08	-	1.38	0.67	-	0.51	-	-	0.19	-	-	-	-	0.05
L1c*	-	-	-	-	1.38	0.25	0.54	0.68	-	0.37	0.78	-	-	0.15	-	0.39
L1c2	0.08	-	-	0.05	-	-	-	0.34	-	-	0.78	-	-	0.15	-	0.39
L0*	-	-	-	-	-	0.34	0.27	-	-	-	0.19	-	-	-	-	0.30
L0a1	-	-	0.04	0.05	-	0.17	0.27	0.17	-	1.49	2.13	-	-	0.46	0.22	0.84
L0a1b	-	-	-	-	-	0.17	-	2.20	-	-	1.16	-	-	0.15	-	0.39
L0a2*	-	-	-	-	-	-	-	-	-	-	-	-	0.20	0.15	0.11	1.82
Sample size	3873	1304	2525	1971	145	1194	372	591	155	269	516	1269	494	655	924	2033
1.- IP = Iberian Peninsula; FRC = France + Corsica; ISS = Italy + Sardinia + Sicily; BAL = Balkans + Crete; SAM = Sahara + Mauritania; MOR = Morocco; ALG = Algeria; TUN = Tunisia; TuAn = Tunisian Andalusians; LIB = Libya; EGY = Egypt; CAU =Caucasus; TUR = Turkey; LEQ = Levant (Jordan; Syria; Palestine; Lebanon; Druze) + Iraq; IRN = Kurds + Iran; ARP = Arabian Peninsula (Saudi Arabia; Kuwait; Duba…
2.- References listed in Supplementary Table S2
