# Supplementary material for: Introducing the Algerian Mitochondrial DNA and Y-Chromosome Profiles into the North African Landscape
Source: PLoS One. 2013 Feb 19;8(2):e56775. doi: 10.1371/journal.pone.0056775 (PMC3576335; doi:10.1371/journal.pone.0056775)
Supplement: Table S9 — MtDNA and Y-chromosome geographic haplogroup assignation. (XLS) [file pone.0056775.s009.xls]

## Sheet: TS9
Table S9.-MtDNA and Y-chromosome geographic haplogroup assignation
A) mtDNA			B) Y-chromosome
Origin	Haplogroup		Origin	Haplogroup	Marker
EA	L0*		EA	A	M91,M13
EA	L0a1		EA	B	M60, M181, SRY10831.1,M150,M109,M112
EA	L0a1b		EA	DE	M1,YAP,M174,M40,M96,M75,M98
EA	L0a2*		EA	E1b1b1	M35
EA	L3c/L4/M		EA	E1b1b1c	M123,M34
EA	L3d1a1		EU	E1b1b1a2	V13
EA	L3d1d		EU	I	M170,M253,P259,M227,M507
EA	L3e1*		EU	I1b	P215,M438,P37.2,M359,P41.2
EA	L3f*		EU	I1b2	M26
EA	L3h1b*		EU	I1c	M223,M284,P78,P95
EA	L3i*		EU	J2a1	M47
EA	L3x*		EU	J2a2	M67,M166
EA	L4a'b*		EU	J2a2a	M92
EA	L5*		EU	J2b	M12,M102,M280, M241
EA	L6		EU	R1b1b1a	M412,P310
EA	N* / M* / L3*		EU	R1b1b1a1	L11
EU	H1		EU	R1b1b1a1a	U106
EU	H11a		EU	R1b1b1a1b	U198,P312,S116
EU	H1a		EU	R1b1b1a1b1	U152
EU	H1b		EU	R1b1b1a1b2	M529
EU	H2a		EU	R1b1b1a1b3,4	M65,M153
EU	H3		EU	R1b1b1a1b5	SRY2627
EU	H5a		ME	C	RPS4Y,M130,M217,M48,M356,M168
EU	H6a		ME	F	M89,M282
EU	H7		ME	G	M201,M285,P15,P16,M406
EU	HV0/HV0a/V		ME	H	M69,M52,M82,M197,M370
EU	I4		ME	J1	M304,M267,P58,M365,M368,M369
EU	J1c7		ME	J2	M172,M410,M158,M319,DYS445=6,M339,M340
EU	J2b1		ME	K	M9,M184
EU	T2b*		ME	L	M11, M20, M27,M76,M317,M274,M349,M357
EU	T2b4		ME	N	M231,M214,LLY22g,Tat,M178
EU	T2e		ME	O	M175,M119
EU	U4c1		ME	P,R	92R7,M207,M173, M45
EU	U5*		ME	Q	MEH2,M242,P36.2,M25,M346
EU	U5a		ME	R1a1	M420,M17, M198, M204, M458
EU	U5a1b1		ME	R1b	M173, M343,P25,M73
EU	U5b*		ME	R1b1b	M269
EU	U5b1b*		ME	R1b1b1	L23
EU	U5b1c		ME	R2	M479,M124
EU	U5b3		ME	T	M70
EU	X2c'e		NA	E1b1b1a	M78
ME	I		NA	E1b1b1a1	V12
ME	A		NA	E1b1b1a1b	V32
ME	B		NA	E1b1b1a3	V22
ME	C/Z		NA	E1b1b1a4	V65
ME	D/G/M9/E		NA	E1b1b1b	M81
ME	F		WA	E1a	M33
ME	H*		WA	E1b1	P2,M2,U175,M191
ME	H13a1		WA	R1b1a	V88,M18
ME	H14a
ME	H20
ME	H2a1
ME	H4
ME	H6b
ME	H8
ME	HV1
ME	I1
ME	J / J1c / J2
ME	J1a'b'e
ME	J1b1a1
ME	J1b2a
ME	J1d / J2b
ME	J1d1
ME	J2a
ME	J2a2a1
ME	K*
ME	K1a*
ME	K1b1*
ME	N1a*
ME	N1b
ME	N1c
ME	N2
ME	N9
ME	R*
ME	R0a
ME	T
ME	T1*
ME	T1a
ME	T2
ME	T2c
ME	T2i
ME	U1*
ME	U2*
ME	U2e
ME	U3*
ME	U4
ME	U4a*
ME	U7
ME	U8*
ME	U9a
ME	X
ME	X1a
ME	X2b1
NA	L3e5
NA	M1
NA	M1a1
NA	U6a
NA	U6a1'2'3
NA	U6b'c'd
WA	L1b*
WA	L1b3
WA	L1c*
WA	L1c2
WA	L2*
WA	L2a
WA	L2a1*
WA	L2a1a2'3'4
WA	L2a1b
WA	L2a1b'f
WA	L2a1c1'2
WA	L2a1(16189)
WA	L2a2
WA	L2b*
WA	L2c1'2
WA	L2d
WA	L2e
WA	L3b
WA	L3b1a3
WA	L3b(16124!)
WA	L3b2a
WA	L3d*
WA	L3e2'3'4
WA	L3f1b*
